# Supplementary material
Source: PubMed Central journal article supplement (PMC2486297)

22.121

24.7

25.2

8.17

IB4

rat iGb3S

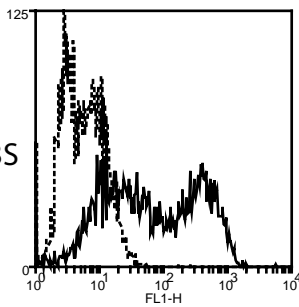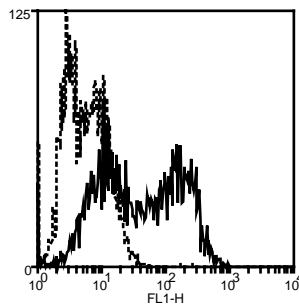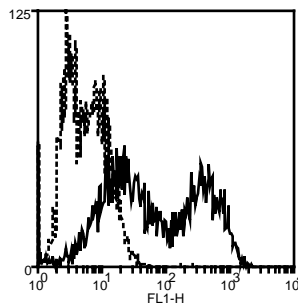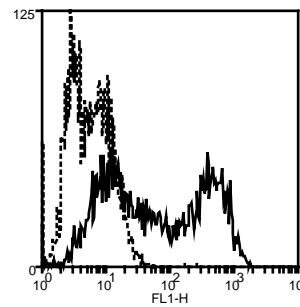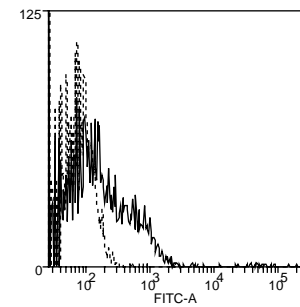

rat/human(Exon 5)-iGb3S

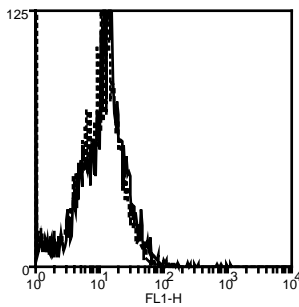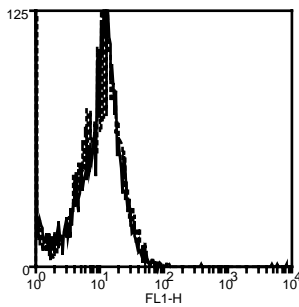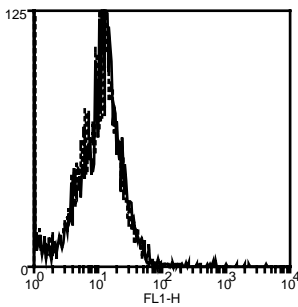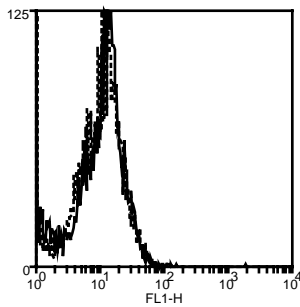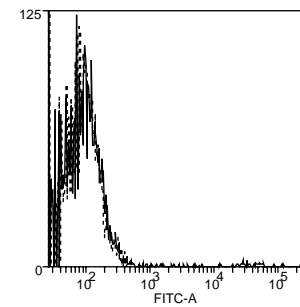

rat/human(Exon 4,5)-iGb3S

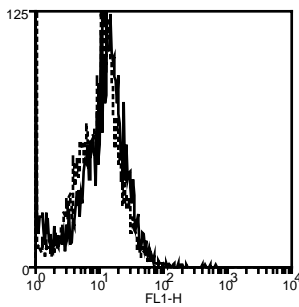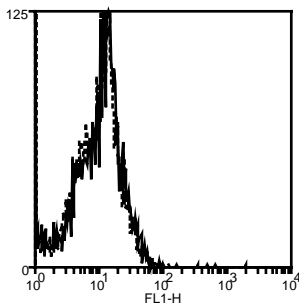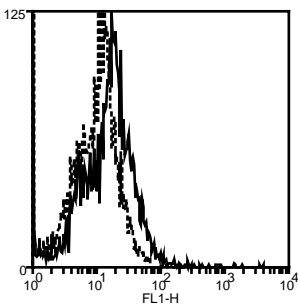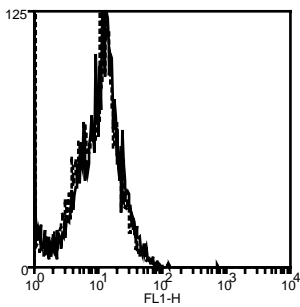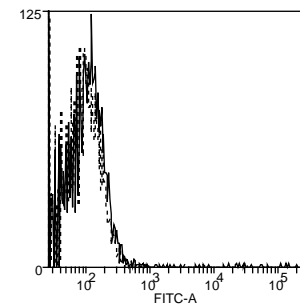

vector

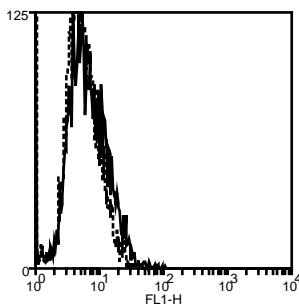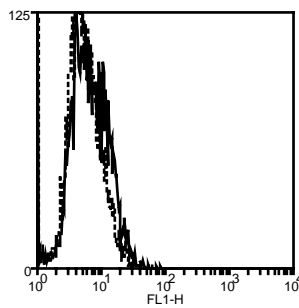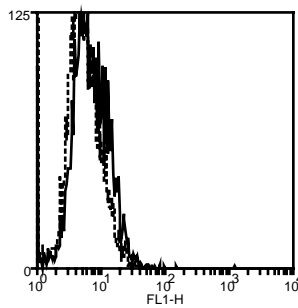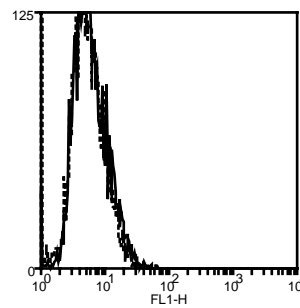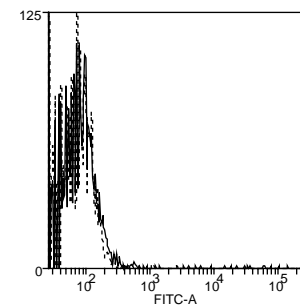

Supplement: pbio.0060172.sg001.pdf [file pbio.0060172.sg001.pdf]
